# Supplementary material
Source: PubMed Central journal article supplement (PMC3624761)
Supplement: NIHMS446047-supplement-1_si_001.pdf [file NIHMS446047-supplement-1_si_001.pdf]

Supporting Information for:

## **Cis–Trans Isomerizations of Proline Residues are Key to Bradykinin Conformations**

Nicholas A. Pierson,<sup>†</sup> Liuxi Chen,<sup>‡</sup> David H. Russell,<sup>‡</sup> and David E. Clemmer<sup>\*,†</sup>

<sup>†</sup>*Department of Chemistry, Indiana University, Bloomington, IN 47405*

<sup>‡</sup>*Department of Chemistry, Texas A&M University, College Station, TX 77843*

Supporting Information section includes Figures S1 through S4 as discussed in the main text.

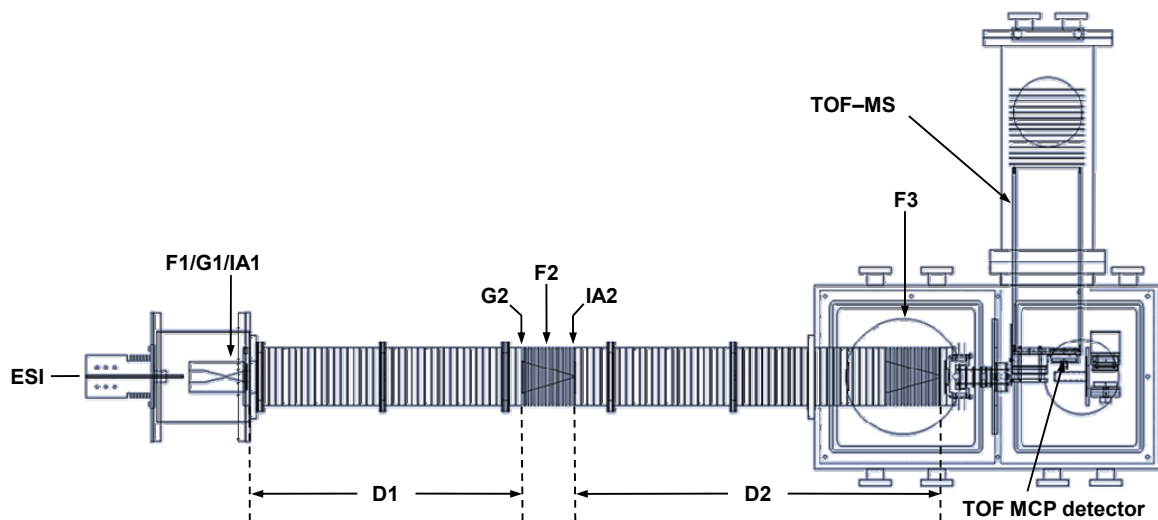

**Figure S1.** Schematic diagram of the home-built ion mobility – mass spectrometer at Indiana University, described in detail in the Experimental section.

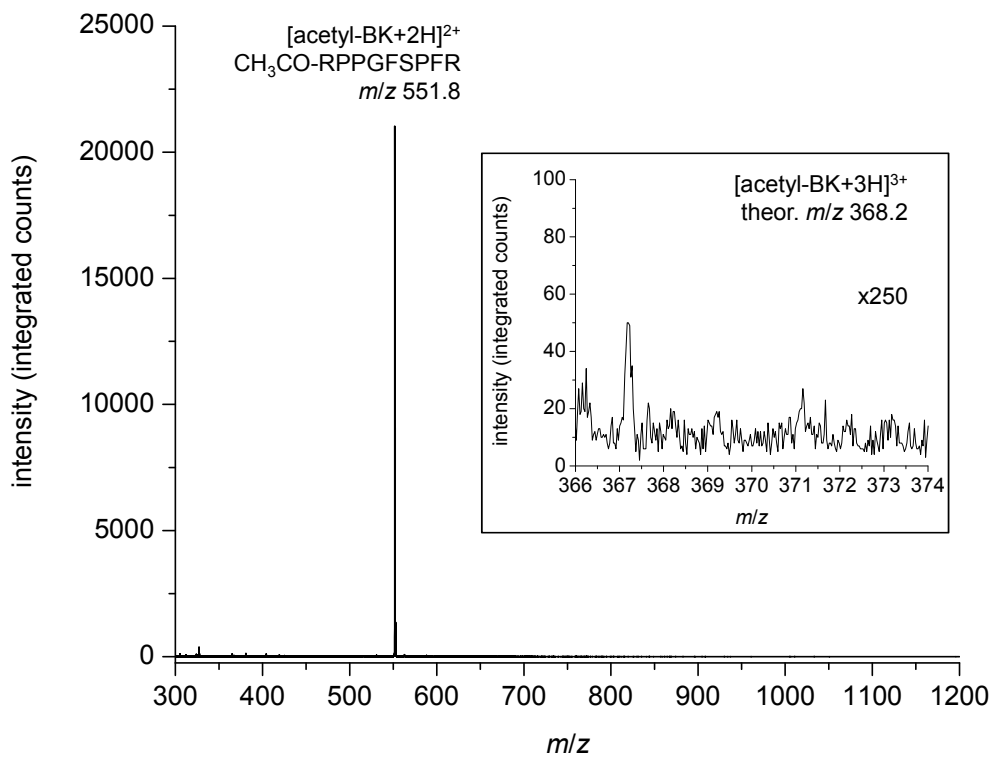

**Figure S2.** Mass spectrum of acetylated BK. The inset is a 250x blow up of  $m/z$  region 366–374, which shows there is no presence of the  $[\text{acetyl-BK}+3\text{H}]^{3+}$  ion at  $m/z$  368.2.

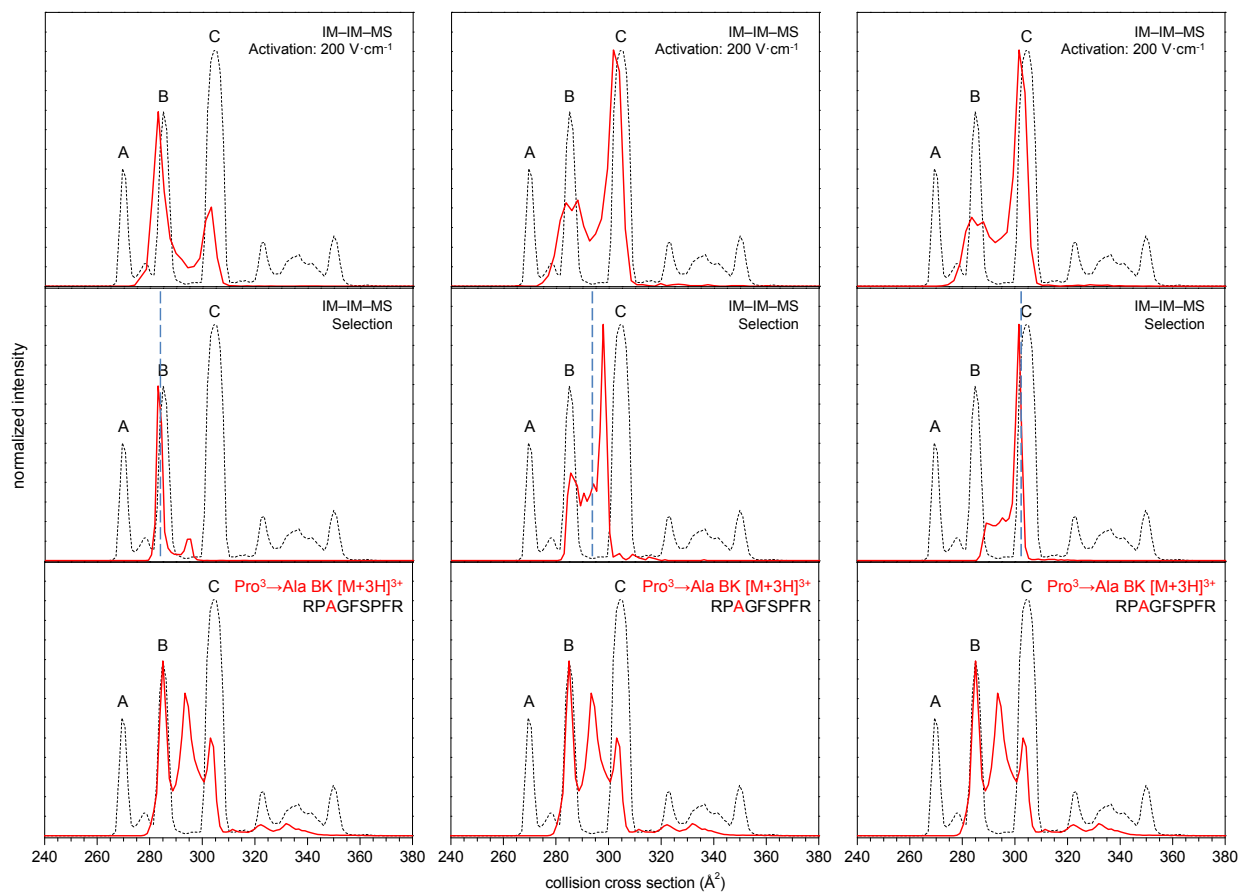

**Figure S3.** IM-IM-MS studies of Pro<sup>3</sup>→Ala BK (RPAGFSPFR) (red traces), where the IM-MS cross section distribution of [M+3H]<sup>3+</sup> ions is shown across the bottom, three different IM-IM-MS selections in the middle (vertical dashed line represents where the selection pulse was applied), and IM-IM-MS distributions obtained from collisional activation of the three selections on top. The [BK+3H]<sup>3+</sup> cross section distribution (dashed traces) is shown in all panels for comparison with the analogue peptide. The IM-IM-MS selection and activation results indicate the middle peak in the IM-MS distribution of Pro<sup>3</sup>→Ala BK [M+3H]<sup>3+</sup> is not a stable conformation. Cross section values for the analogue peptide were shifted to compare with BK according to amino acid size parameters in ref. 33.

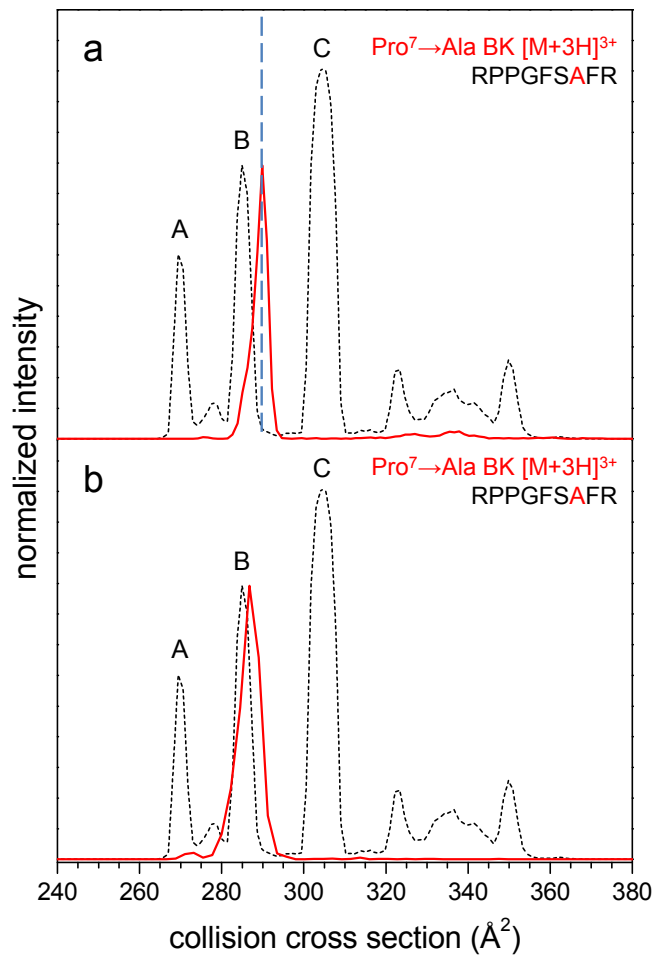

**Figure S4.** IM-IM-MS (a) selection of  $[\text{Pro}^7 \rightarrow \text{Ala BK} + 3\text{H}]^{3+}$  and (b) activation by application of 60 V ( $200 \text{ V} \cdot \text{cm}^{-1}$ ) in IA2 region. The vertical dashed line represents where across the distribution the selection pulse was applied. Upon activation, the distribution shifts to a higher mobility. Cross section values for the analogue peptide were shifted to compare with BK according to amino acid size parameters in ref. 33.
